# Supplementary material for: Fetuin-A and Fetuin-B in Non-Alcoholic Fatty Liver Disease: A Meta-Analysis and Meta-Regression
Source: MDPI journal article supplement (doi:10.3390/ijerph17082735), 2020-04-15
Supplement: s1 [file s1]

Search strategies: details of search strategy.

((alpha 2 HS Glycoprotein[Title/Abstract] OR alpha(2) HS Glycoprotein[Title/Abstract] OR alpha-2HS Glycoprotein[Title/Abstract] OR alpha 2HS Glycoprotein[Title/Abstract] OR alpha2HS Glycoprotein[Title/Abstract] OR Fetuin-A[Title/Abstract] OR Fetuin A[Title/Abstract] OR AHSG Protein[Title/Abstract] OR alpha2 Heremans-Schmid Glycoprotein[Title/Abstract] OR alpha-2-HS-Glycoprotein[Title/Abstract] OR fetuins[Title/Abstract] OR Fetuin[Title/Abstract] OR Fetuin-B[Title/Abstract] OR Fetuin B[Title/Abstract])) AND (Non alcoholic Fatty Liver Disease OR NAFLD OR Nonalcoholic Fatty Liver Disease OR Fatty Liver, Nonalcoholic OR Fatty Livers, Nonalcoholic OR Liver, Nonalcoholic Fatty OR Livers, Nonalcoholic Fatty OR Nonalcoholic Fatty Liver OR Nonalcoholic Fatty Livers OR Nonalcoholic Steatohepatitis OR Nonalcoholic Steatohepatitides OR Steatohepatitides, Nonalcoholic OR Steatohepatitis, Nonalcoholic OR Non-alcoholic Fatty Liver Disease OR non-alcoholic steatohepatitis OR NASH OR Fatty Liver OR nonalcoholic steatohepatitis OR non-alcoholic fatty liver disease)

367 of PubMed

(TOPIC: (((((((((((((((Non alcoholic Fatty Liver Disease OR NAFLD) OR Nonalcoholic Fatty Liver Disease) OR Fatty Liver, Nonalcoholic) OR Fatty Livers, Nonalcoholic) OR Liver, Nonalcoholic Fatty) OR Livers, Nonalcoholic Fatty) OR Nonalcoholic Fatty Liver) OR Nonalcoholic Fatty Livers) OR Nonalcoholic Steatohepatitis) OR Nonalcoholic steatohepatities) OR steatohepatities, Nonalcoholic) OR Steatohepatitis, Nonalcoholic) OR Non-alcoholic Fatty Liver Disease) OR non-alcoholic steatohepatitis) OR NASH) OR Fatty Liver) OR nonalcoholic steatohepatitis) OR non-alcoholic fatty liver disease) AND TOPIC: (((((((((((alpha 2 HS Glycoprotein OR alpha 2 HS Glycoprotein) OR alpha-2HS Glycoprotein) OR alpha 2HS Glycoprotein) OR alpha2ms Glycoprotein) OR Fetuin-A) OR Fetuin A) OR ahs protein) OR alpha2 Heremans-Schmid Glycoprotein) OR alpha-2-HS-Glycoprotein) OR fetuin) OR Fetuin OR Fetuin-B) OR Fetuin B)))

266 of Web of Science

('alpha 2 hs glycoprotein':ab,ti OR 'alpha(2) hs glycoprotein':ab,ti OR 'alpha-2hs glycoprotein':ab,ti OR 'alpha 2hs glycoprotein':ab,ti OR 'alpha2hs glycoprotein':ab,ti OR 'fetuin-a':ab,ti OR 'fetuin a':ab,ti OR 'ahsg protein':ab,ti OR 'alpha2 heremans-schmid glycoprotein':ab,ti OR 'alpha-2-hs-glycoprotein':ab,ti OR 'fetuins':ab,ti OR 'fetuin':ab,ti OR 'fetuin-b':ab,ti OR 'fetuin b':ab,ti) AND ('non alcoholic fatty liver disease'/exp OR 'non alcoholic fatty liver disease' (non AND ('alcoholic'/exp OR alcoholic) AND fatty AND ('liver'/exp OR liver) AND ('disease'/exp OR disease)) OR nafld OR 'nonalcoholic fatty liver disease'/exp OR 'nonalcoholic fatty liver disease' (nonalcoholic AND fatty AND ('liver'/exp OR liver) AND ('disease'/exp OR disease)) OR 'fatty liver, nonalcoholic' (fatty AND liver, AND nonalcoholic) OR 'fatty livers, nonalcoholic' (fatty AND livers, AND nonalcoholic) OR 'liver, nonalcoholic fatty' (liver, AND nonalcoholic AND fatty) OR

'livers, nonalcoholic fatty' OR (livers, AND nonalcoholic AND fatty) OR 'nonalcoholic fatty liver'/exp OR 'nonalcoholic fatty liver' OR (nonalcoholic AND fatty AND ('liver'/exp OR liver)) OR 'nonalcoholic fatty livers' OR (nonalcoholic AND fatty AND livers) OR 'nonalcoholic steatohepatitides' OR (nonalcoholic AND steatohepatitides) OR 'steatohepatitides, nonalcoholic' OR (steatohepatitides, AND nonalcoholic) OR 'steatohepatitis, nonalcoholic' OR (steatohepatitis, AND nonalcoholic) OR 'non-alcoholic steatohepatitis'/exp OR 'non-alcoholic steatohepatitis' OR ('non alcoholic' AND ('steatohepatitis'/exp OR steatohepatitis)) OR nash OR 'fatty liver'/exp OR 'fatty liver' OR (fatty AND ('liver'/exp OR liver)) OR 'nonalcoholic steatohepatitis'/exp OR 'nonalcoholic steatohepatitis' OR (nonalcoholic AND ('steatohepatitis'/exp OR steatohepatitis)) OR 'non-alcoholic fatty liver disease'/exp OR 'non-alcoholic fatty liver disease' OR ('non alcoholic' AND fatty AND ('liver'/exp OR liver) AND ('disease'/exp OR disease)))

181 of Embase

alpha 2HS Glycoprotein OR alpha2HS Glycoprotein OR Fetuin-A OR Fetuin A OR AHSG Protein OR fetuins OR Fetuin in Title Abstract Keyword AND Non alcoholic Fatty Liver Disease OR NAFLD OR Nonalcoholic Fatty Liver Disease OR Fatty Liver, Nonalcoholic OR Fatty Livers, Nonalcoholic OR Liver, Nonalcoholic Fatty OR Livers, Nonalcoholic Fatty OR Nonalcoholic Fatty Liver OR Nonalcoholic Fatty Livers OR Nonalcoholic Steatohepatitis OR Nonalcoholic Steatohepatitides OR Steatohepatitides, Nonalcoholic OR Steatohepatitis, Nonalcoholic OR Non-alcoholic Fatty Liver Disease OR non-alcoholic steatohepatitis OR NASH OR Fatty Liver OR nonalcoholic steatohepatitis OR non-alcoholic fatty liver disease in Title Abstract Keyword

17 of Cochrane

| Section/topic             | # | Checklist item                                                                                                                                                                                                                                                                                              | Reported on page # |
|---------------------------|---|-------------------------------------------------------------------------------------------------------------------------------------------------------------------------------------------------------------------------------------------------------------------------------------------------------------|--------------------|
| <b>TITLE</b>              |   |                                                                                                                                                                                                                                                                                                             |                    |
| Title                     | 1 | Identify the report as a systematic review, meta-analysis, or both.                                                                                                                                                                                                                                         | 1                  |
| <b>ABSTRACT</b>           |   |                                                                                                                                                                                                                                                                                                             |                    |
| Structured summary        | 2 | Provide a structured summary including, as applicable: background; objectives; data sources; study eligibility criteria, participants, and interventions; study appraisal and synthesis methods; results; limitations; conclusions and implications of key findings; systematic review registration number. | 2                  |
| <b>INTRODUCTION</b>       |   |                                                                                                                                                                                                                                                                                                             |                    |
| Rationale                 | 3 | Describe the rationale for the review in the context of what is already known.                                                                                                                                                                                                                              | 3                  |
| Objectives                | 4 | Provide an explicit statement of questions being addressed with reference to participants, interventions, comparisons, outcomes, and study design (PICOS).                                                                                                                                                  | 3 & 4              |
| <b>METHODS</b>            |   |                                                                                                                                                                                                                                                                                                             |                    |
| Protocol and registration | 5 | Indicate if a review protocol exists, if and where it can be accessed (e.g., Web address), and, if available, provide registration information including registration number.                                                                                                                               | 4                  |
| Eligibility criteria      | 6 | Specify study characteristics (e.g., PICOS, length of follow-up) and report characteristics (e.g., years considered, language, publication status) used as criteria for eligibility, giving rationale.                                                                                                      | 5                  |
| Information sources       | 7 | Describe all information sources (e.g., databases with dates of coverage, contact with study authors to identify additional studies) in the search and date last searched.                                                                                                                                  | 6                  |
| Search                    | 8 | Present full electronic search strategy for at least one database, including any limits used, such that it could be repeated.                                                                                                                                                                               | 5 & 6              |

|                                    |    |                                                                                                                                                                                                                        |       |
|------------------------------------|----|------------------------------------------------------------------------------------------------------------------------------------------------------------------------------------------------------------------------|-------|
| Study selection                    | 9  | State the process for selecting studies (i.e., screening, eligibility, included in systematic review, and, if applicable, included in the meta-analysis).                                                              | 6     |
| Data collection process            | 10 | Describe method of data extraction from reports (e.g., piloted forms, independently, in duplicate) and any processes for obtaining and confirming data from investigators.                                             | 6     |
| Data items                         | 11 | List and define all variables for which data were sought (e.g., PICOS, funding sources) and any assumptions and simplifications made.                                                                                  |       |
| Risk of bias in individual studies | 12 | Describe methods used for assessing risk of bias of individual studies (including specification of whether this was done at the study or outcome level), and how this information is to be used in any data synthesis. | 6     |
| Summary measures                   | 13 | State the principal summary measures (e.g., risk ratio, difference in means).                                                                                                                                          | 6 & 7 |
| Synthesis of results               | 14 | Describe the methods of handling data and combining results of studies, if done, including measures of consistency (e.g., $I^2$ ) for each meta-analysis.                                                              | 7     |

| Section/topic               | #  | Checklist item                                                                                                                                   | Reported on page #                                 |
|-----------------------------|----|--------------------------------------------------------------------------------------------------------------------------------------------------|----------------------------------------------------|
| Risk of bias across studies | 15 | Specify any assessment of risk of bias that may affect the cumulative evidence (e.g., publication bias, selective reporting within studies).     | 7                                                  |
| Additional analyses         | 16 | Describe methods of additional analyses (e.g., sensitivity or subgroup analyses, meta-regression), if done, indicating which were pre-specified. | 7<br>sensitivity or<br>meta-regression<br>analyses |
| <b>RESULTS</b>              |    |                                                                                                                                                  |                                                    |

|                               |    |                                                                                                                                                                                                          |                                                         |
|-------------------------------|----|----------------------------------------------------------------------------------------------------------------------------------------------------------------------------------------------------------|---------------------------------------------------------|
| Study selection               | 17 | Give numbers of studies screened, assessed for eligibility, and included in the review, with reasons for exclusions at each stage, ideally with a flow diagram.                                          | 7 & 8                                                   |
| Study characteristics         | 18 | For each study, present characteristics for which data were extracted (e.g., study size, PICOS, follow-up period) and provide the citations.                                                             | 8                                                       |
| Risk of bias within studies   | 19 | Present data on risk of bias of each study and, if available, any outcome level assessment (see item 12).                                                                                                | 8                                                       |
| Results of individual studies | 20 | For all outcomes considered (benefits or harms), present, for each study: (a) simple summary data for each intervention group (b) effect estimates and confidence intervals, ideally with a forest plot. | 8 & 9                                                   |
| Synthesis of results          | 21 | Present results of each meta-analysis done, including confidence intervals and measures of consistency.                                                                                                  | 9                                                       |
| Risk of bias across studies   | 22 | Present results of any assessment of risk of bias across studies (see Item 15).                                                                                                                          | 9 & 10                                                  |
| Additional analysis           | 23 | Give results of additional analyses, if done (e.g., sensitivity or subgroup analyses, meta-regression [see Item 16]).                                                                                    | 9 & 10<br>sensitivity or<br>meta-regression<br>analyses |
| <b>DISCUSSION</b>             |    |                                                                                                                                                                                                          |                                                         |
| Summary of evidence           | 24 | Summarize the main findings including the strength of evidence for each main outcome; consider their relevance to key groups (e.g., healthcare providers, users, and policy makers).                     | 10-13                                                   |
| Limitations                   | 25 | Discuss limitations at study and outcome level (e.g., risk of bias), and at review-level (e.g., incomplete retrieval of identified research, reporting bias).                                            | 13                                                      |
| Conclusions                   | 26 | Provide a general interpretation of the results in the context of other evidence, and implications for future research.                                                                                  | 13                                                      |
| <b>FUNDING</b>                |    |                                                                                                                                                                                                          |                                                         |
| Funding                       | 27 | Describe sources of funding for the systematic review and other support (e.g., supply of data); role of funders for the systematic review.                                                               | 1                                                       |

*From:* Moher D, Liberati A, Tetzlaff J, Altman DG, The PRISMA Group (2009). Preferred Reporting Items for Systematic Reviews and Meta-Analyses: The PRISMA Statement. PLoS Med 6(7): e1000097. doi:10.1371/journal.pmed1000097

For more information, visit: [www.prisma-statement.org](http://www.prisma-statement.org).
